# Supplementary material
Source: PubMed Central journal article supplement (PMC4394153)
Supplement: NIHMS62922-supplement-1.pdf [file NIHMS62922-supplement-1.pdf]

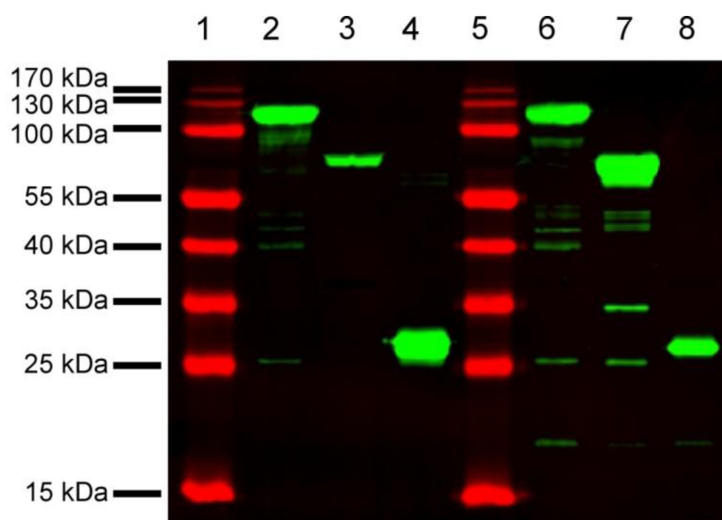

**Fig. S1.** Expression analysis of EGFP chimera and EGFP alone by Western-blotting using mouse anti-GFP antibody (Roche) and IRdye labeled goat anti-mouse antibody (LICOR).

Whole-cell extracts of *E. coli* BL21 expressing (PelB)SgsE\_C-EGFP (lane 2), (SP)MBP-EGFP (lane 3), (PelB)EGFP (lane 4), SgsE\_C-EGFP (lane 6), MBP-EGFP without signal peptide (lane 7), and EGFP (lane 8) were loaded at a concentration corresponding to 1 mg wet cell pellet and separated by SDS-PAGE on a 12% gel prior to blotting. PageRuler Prestained Protein ladder (Fermentas) was loaded on lanes 1 and 5.

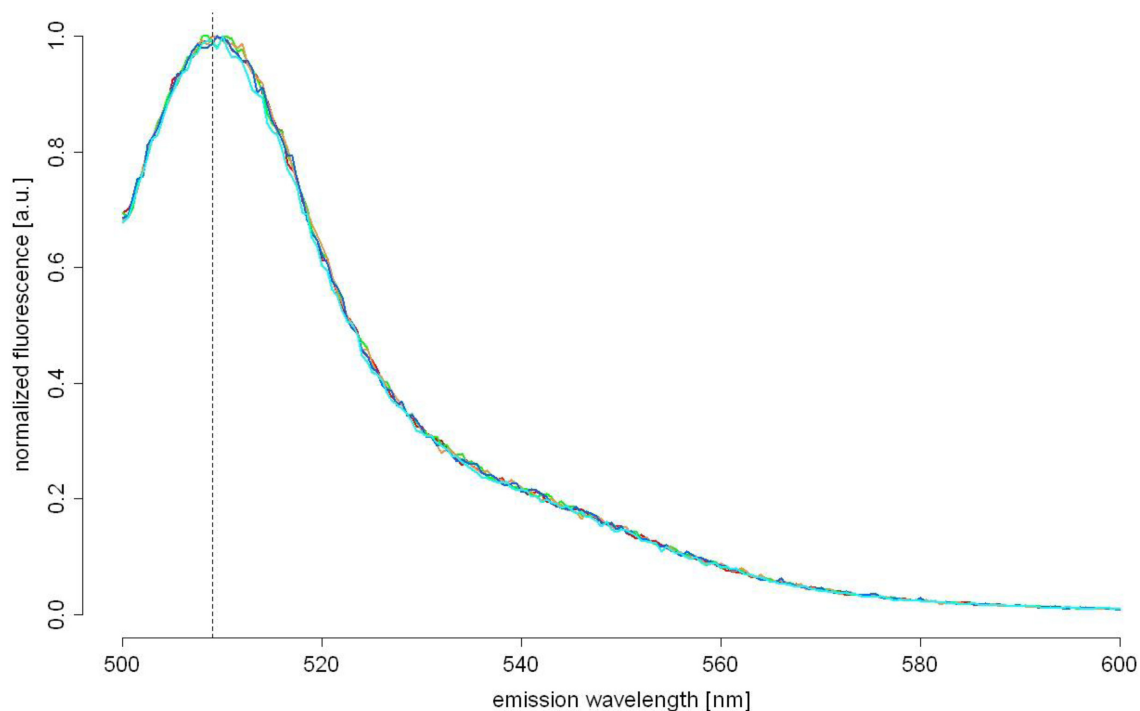

**Fig. S2.** Overlay of emission spectra of SgsE\_C-EGFP (red), SgsE\_G-EGFP (blue), EGFP (green), MBP-EGFP (orange), and SgsE\_M-EGFP (cyan).

Measurements were performed in sample buffer (pH 8.0) at 0.05  $\mu$ M protein concentration. Fluorescence was excited at 488 nm and emission intensity was recorded at wavelengths from 500 nm to 600 nm each 0.5 nm. The bandwidth for both emission and excitation was 5 nm and the scanning speed was 1,200 nm/min. Each sample was measured three times. Triplicate values were averaged, corrected for background, and normalized to the maximum value. The dashed line indicates the emission maximum at 509 nm.

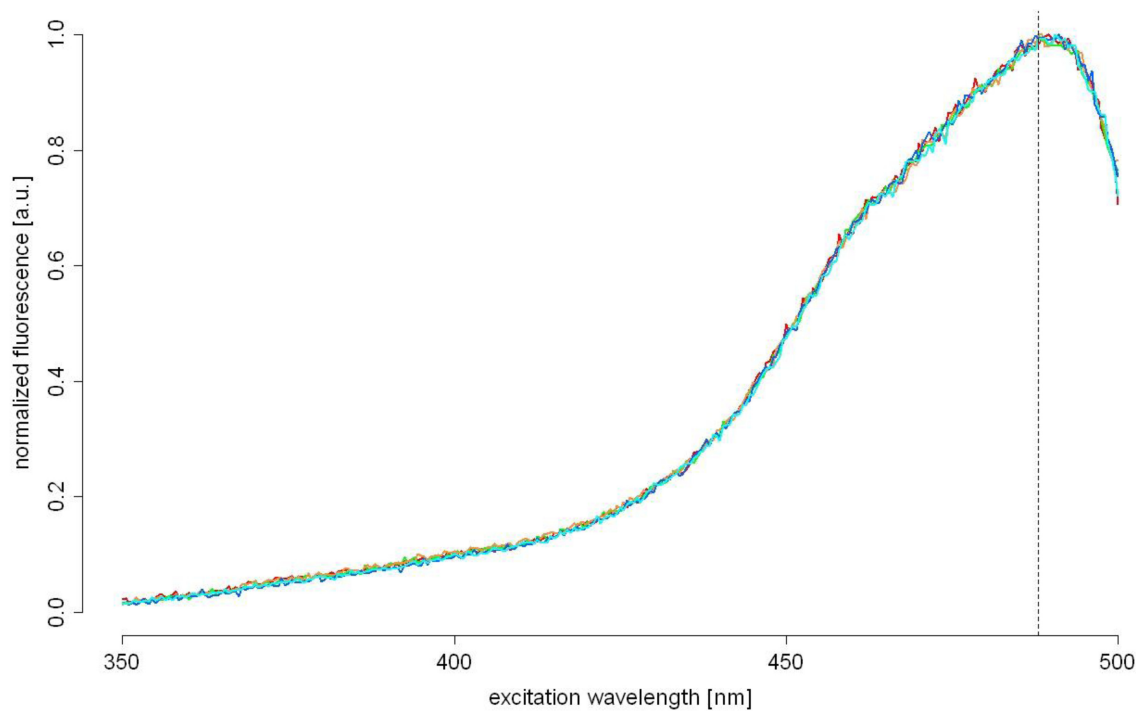

**Fig. S3.** Overlay of excitation spectra of SgsE\_C-EGFP (red), SgsE\_G-EGFP (blue), EGFP (green), MBP-EGFP (orange), and SgsE\_M-EGFP (cyan).

Measurements were performed in sample buffer (pH 8.0) at 0.05  $\mu$ M protein concentration. Fluorescence intensity was measured at 509 nm upon excitation at wavelengths from 350 nm to 500 nm each 0.5 nm. The bandwidth for both emission and excitation was 5 nm and the scanning speed was 1,200 nm/min. Each sample was measured three times. Triplicate values were averaged, corrected for background, and normalized to the maximum value. The dashed line indicates the wavelength of 488 nm, which was applied for excitation throughout this study.
